# Supplementary material for: ASXL1 mutations are associated with distinct epigenomic alterations that lead to sensitivity to venetoclax and azacytidine
Source: PubMed Central journal article supplement (PMC8455571; doi:10.1038/s41408-021-00541-0), 2021-09-21
Supplement: 41408_2021_541_MOESM1_ESM.pdf [file 41408_2021_541_MOESM1_ESM.pdf]

In the Supplementary Information file you will find the following:

- Supplementary Methods
- Supplementary Table 1
- Supplementary Figures 1-3

The Supplementary Information file is submitted as a PDF.
